# Supplementary material for: Bio-SAXS of single-stranded DNA-binding proteins: radiation protection by the compatible solute ectoine
Source: Royal Society of Chemistry journal article supplement (doi:10.1039/d2cp05053f), 2023-01-01
Supplement: d2cp05053f1.pdf [file d2cp05053f1.pdf]

Electronic Supplementary Information.  
Bio-SAXS of Single-Stranded DNA-Binding  
Proteins: Radiation Protection by the  
Compatible Solute Ectoine

Dorothea C. Hallier<sup>1,2,3</sup>, Glen J. Smales<sup>3</sup>, Harald Seitz<sup>1,2</sup>, and Marc  
Benjamin Hahn<sup>\*3</sup>

<sup>1</sup>Universität Potsdam, Institut für Biochemie und Biologie, 14476  
Potsdam, Germany

<sup>2</sup>Fraunhofer Institute for Cell Therapy and Immunology, Branch  
Bioanalytics and Bioprocesses (IZI-BB), 14476 Potsdam, German

<sup>3</sup>Bundesanstalt für Materialforschung und -prüfung (BAM), 12205  
Berlin, Germany

In the following additional scattering curves and fitting results and data are  
presented. Details can be found in the main text.

---

<sup>\*</sup>marc-benjamin.hahn@fu-berlin.de

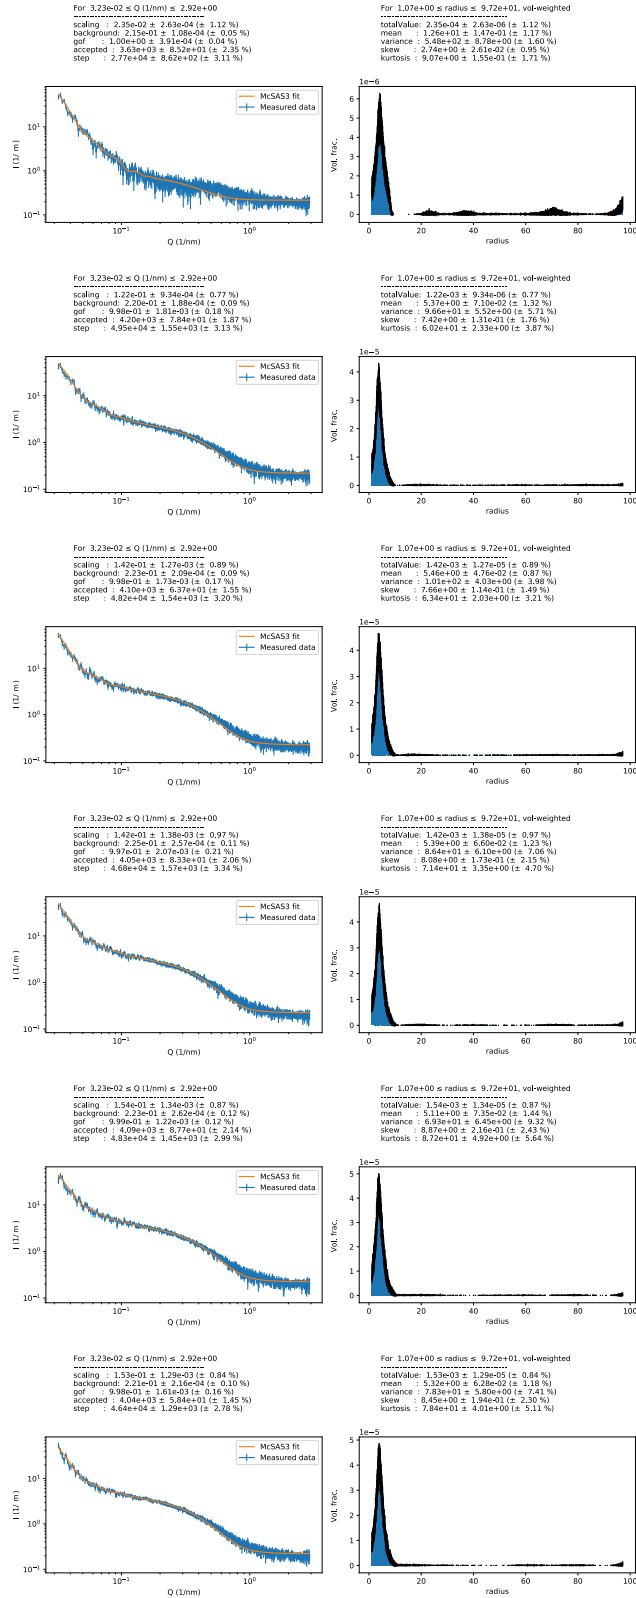

Figure 1: Scattering curves (left) and corresponding McSAS3 fitting results (right) for G5P at 1 mg/mL without Ectoine at (top to bottom) at  $t=1$  s 100 s, 200 s, 300 s 400 s, and 500 s.

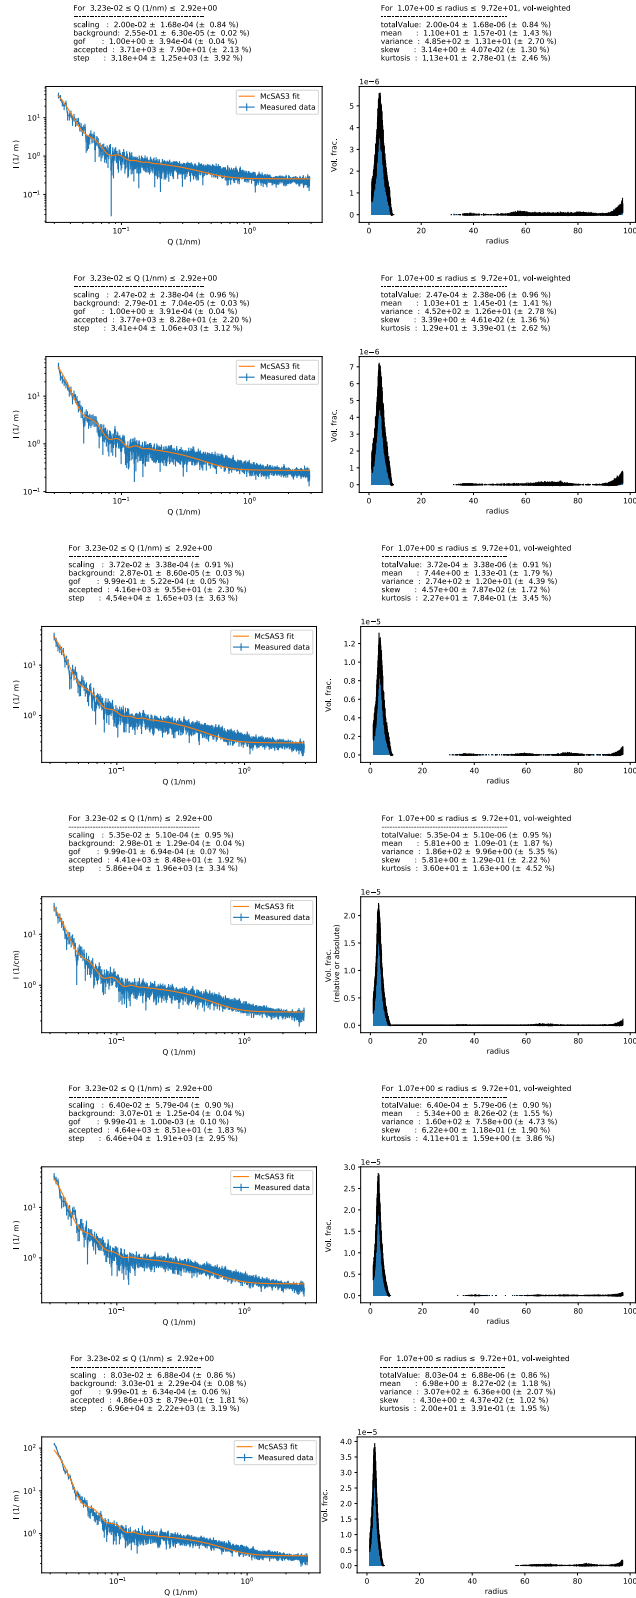

Figure 2: Scattering curves (left) and corresponding McSAS3 fitting results (right) for G5P at 1 mg/mL with Ectoine at (top to bottom) at  $t=1s$  100s, 200s, 300s 400s, and 500s.

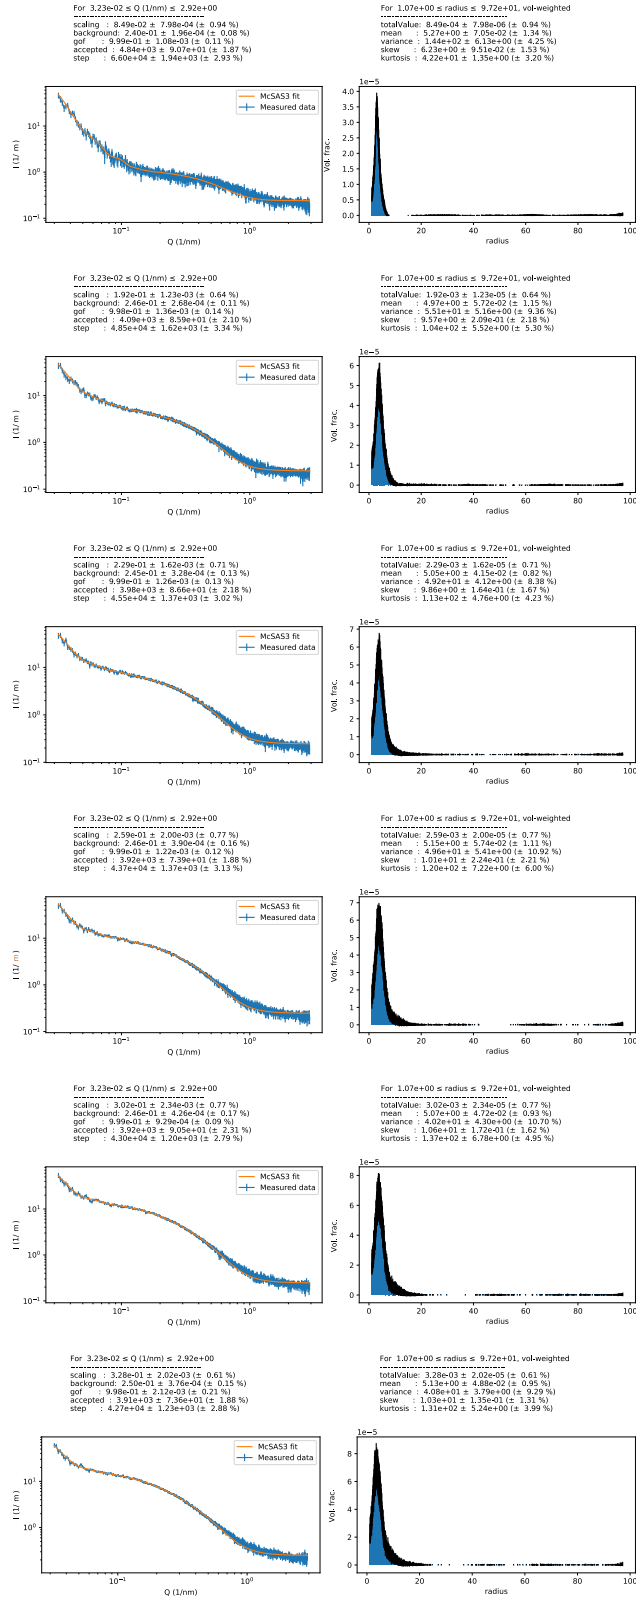

Figure 3: Scattering curves (left) and corresponding McSAS3 fitting results (right) for G5P at 2mg/mL without Ectoine at (top to bottom) at t=1 s 100s, 200s, 300s 400s, and 500s.

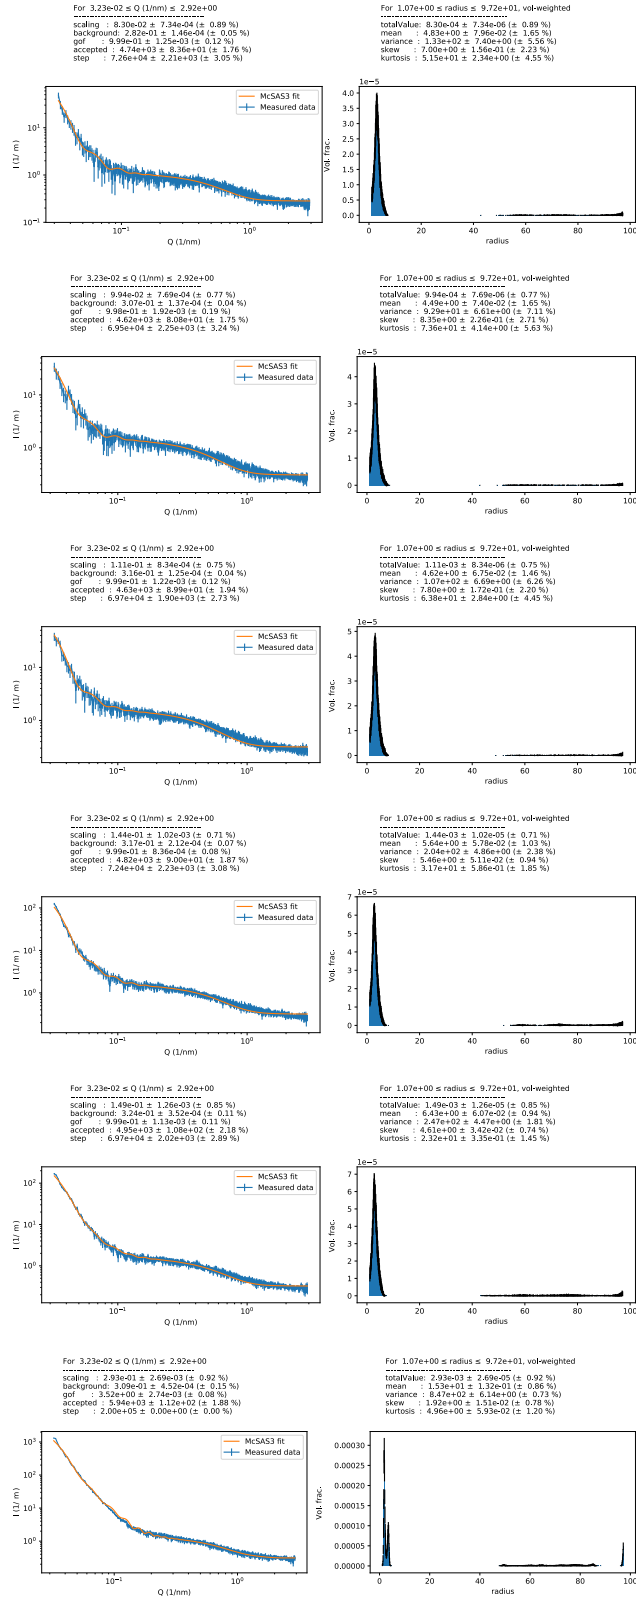

Figure 4: Scattering curves (left) and corresponding McSAS3 fitting results (right) for G5P at 2mg/mL with Ectoine at (top to bottom) at  $t=1$  s, 100 s, 200 s, 300 s, 400 s, and 500 s.

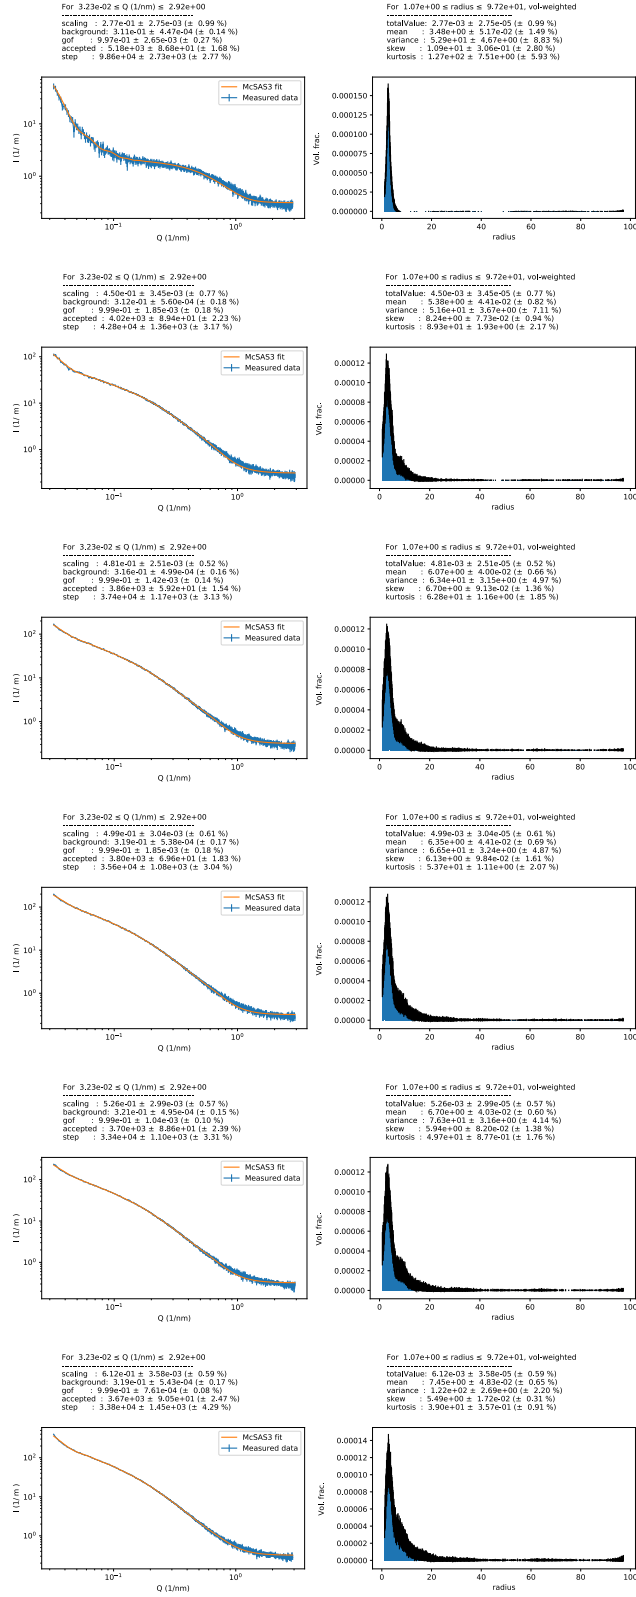

Figure 5: Scattering curves (left) and  $\delta$  corresponding McSAS3 fitting results (right) for G5P at 4mg/mL without Ectoine at (top to bottom) at  $t=1s$  100s, 200s, 300s 400s, and 500s.

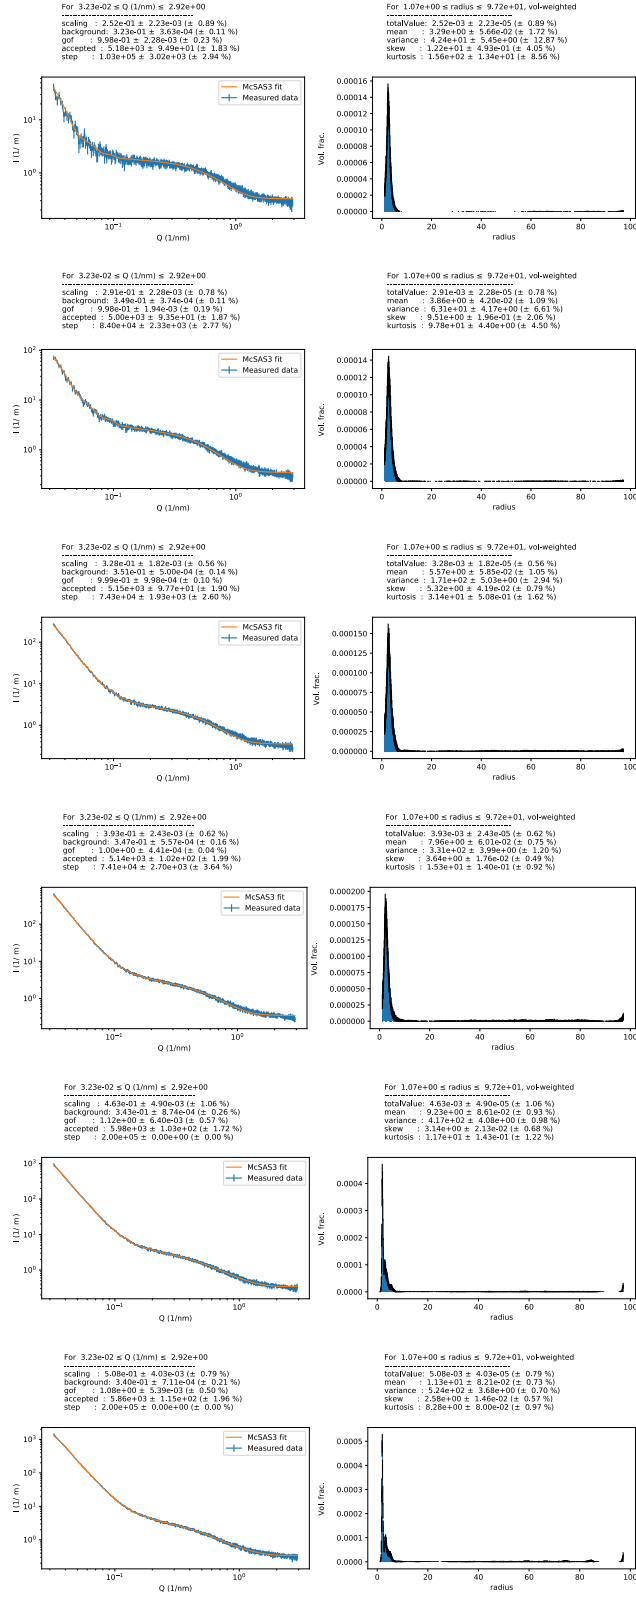

Figure 6: Scattering curves (left) and  $\bar{r}$  corresponding McSAS3 fitting results (right) for G5P at 4mg/mL with Ectoine at (top to bottom) at t=1s 100s, 200s, 300s 400s, and 500s.

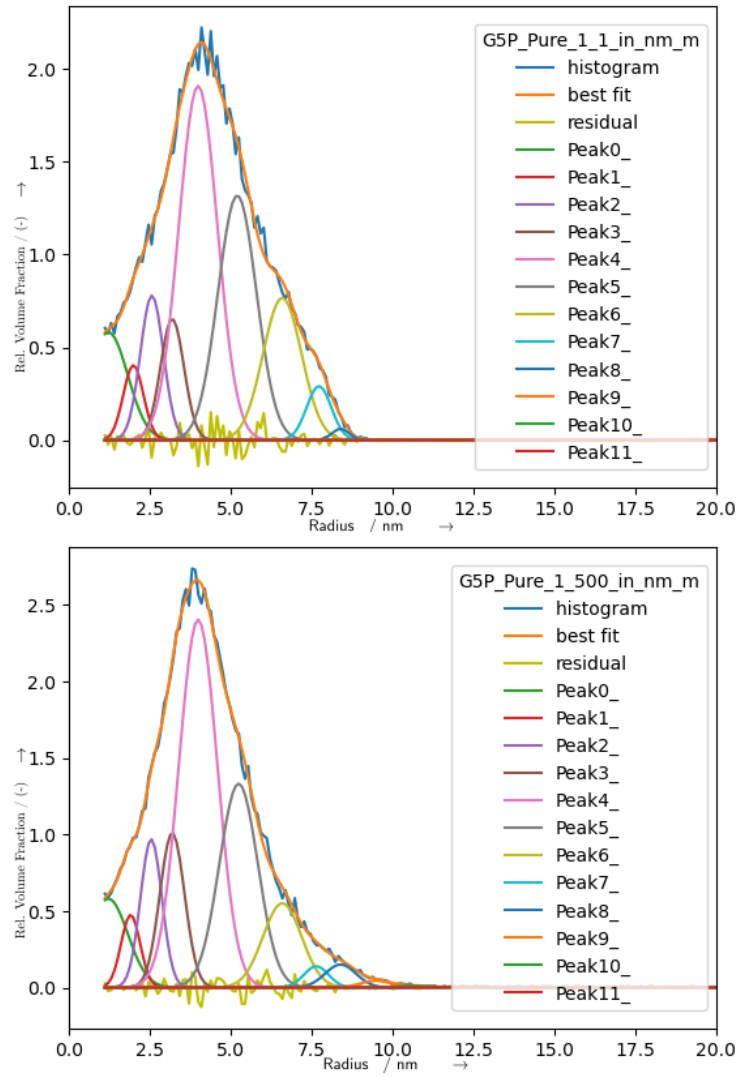

Figure 7: Exemplary histograms of the fitted radii for pure solutions (1 mg/mL) at the beginning (top) and end (bottom) of the irradiation. For details see the main text.



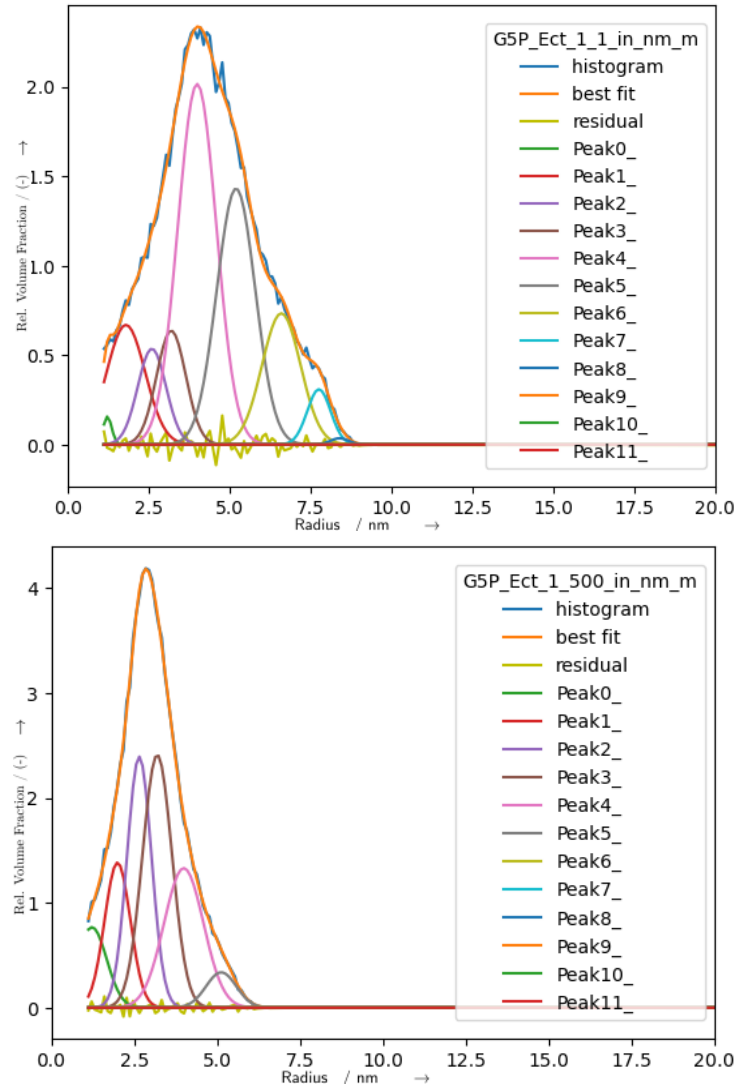

Figure 8: Exemplary histograms of the fitted radii for Ectoine containing solutions (1 mg/mL) at the beginning (top) and end (bottom) of the irradiation. For details see the main text.

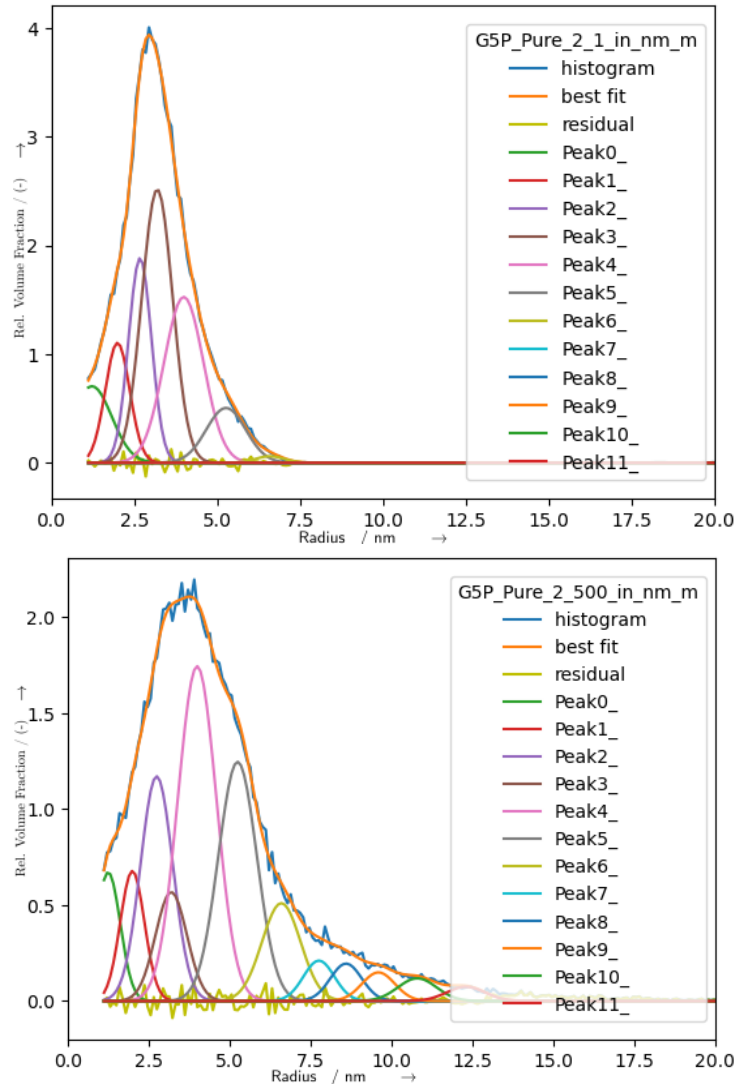

Figure 9: Exemplary histograms of the fitted radii for pure solutions (2 mg/mL) at the beginning (top) and end (bottom) of the irradiation. For details see the main text.

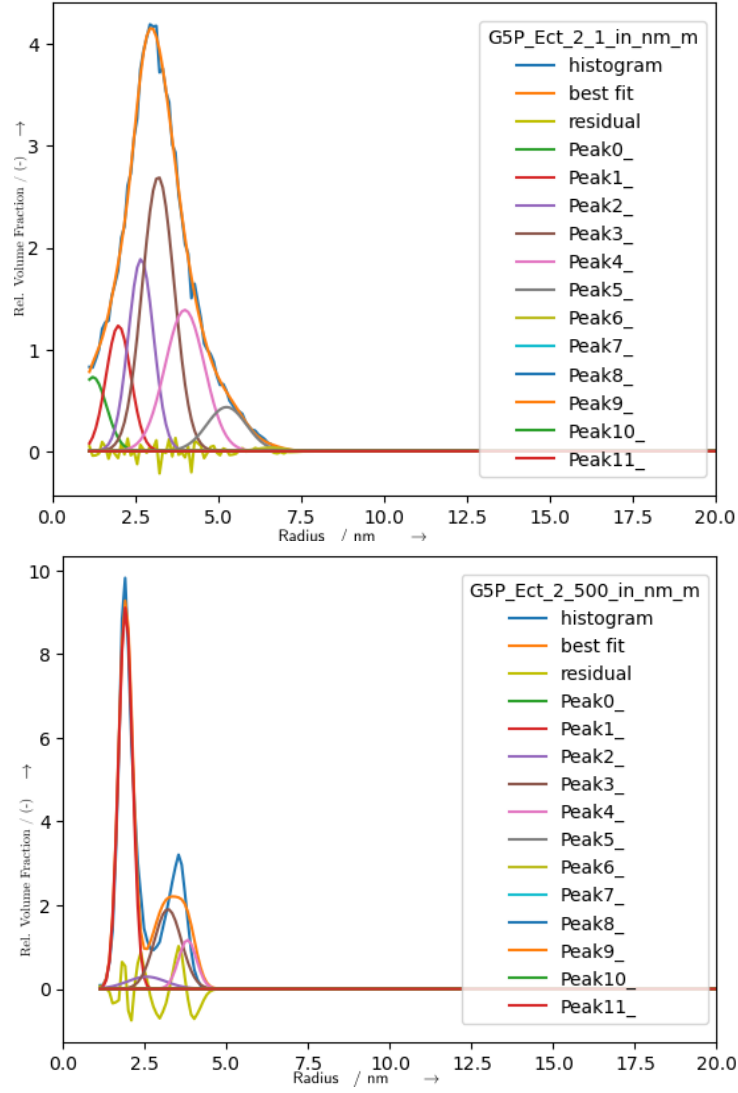

Figure 10: Exemplary histograms of the fitted radii for Ectoine containing solutions (2 mg/mL) at the beginning (top) and end (bottom) of the irradiation. For details see the main text.

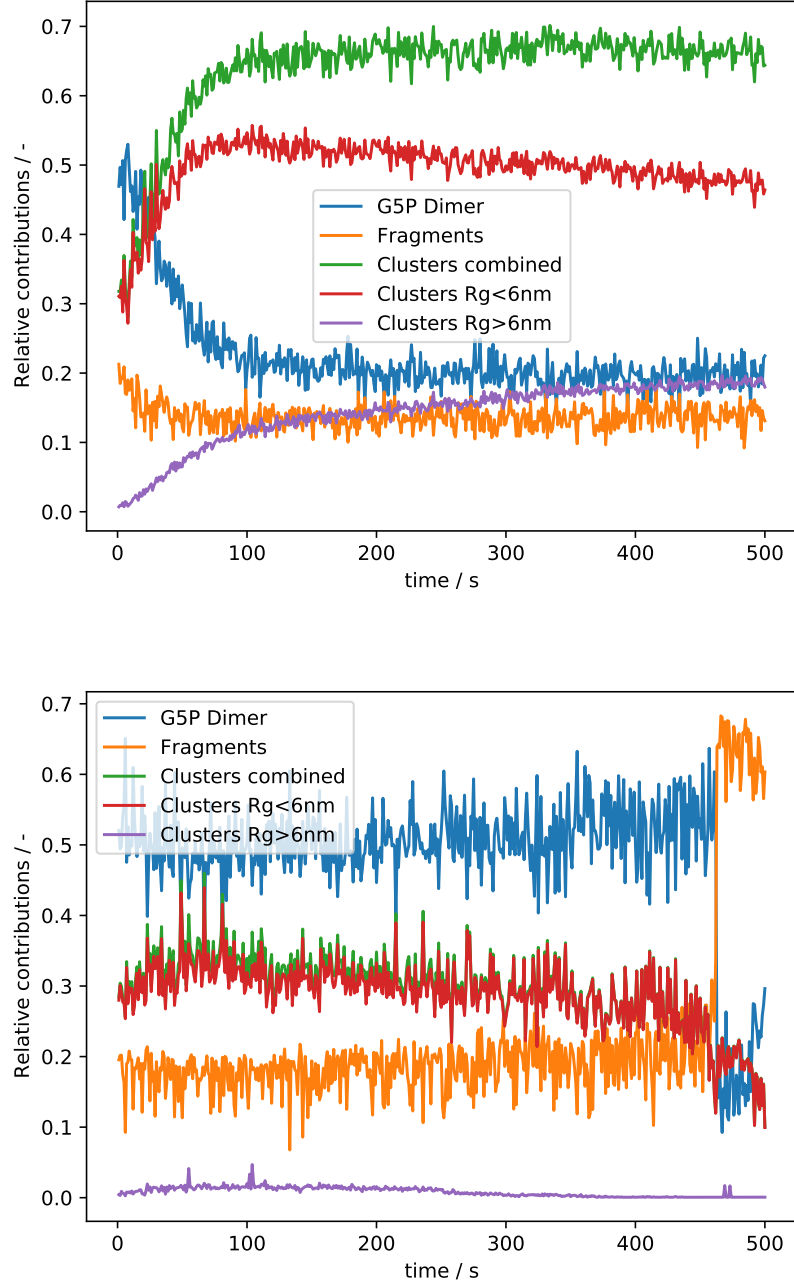

Figure 11: Time evolution of the fits of the different Gaussians corresponding to the various G5P species at concentrations of 2 mg/mL resulting in the distribution of the different fitted radii for pure solutions, without (top) and with (bottom) Ectoine.

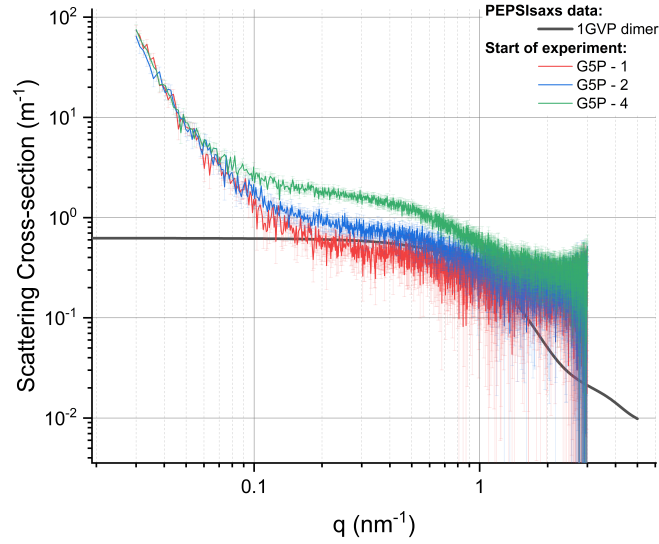

Figure 12: Measured scattering curves of pure G5P with the indicated concentrations at the beginning of the measurements together with the simulated curve from Pepsi-SAXS as described in the main manuscript.

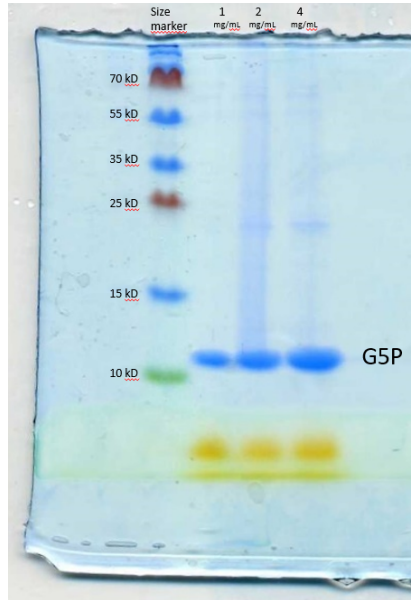

Figure 13: SDS-PAGE (15 %) with G5P purified protein in different concentrations and size marker. The gel was stained with Coomassie brilliant blue.

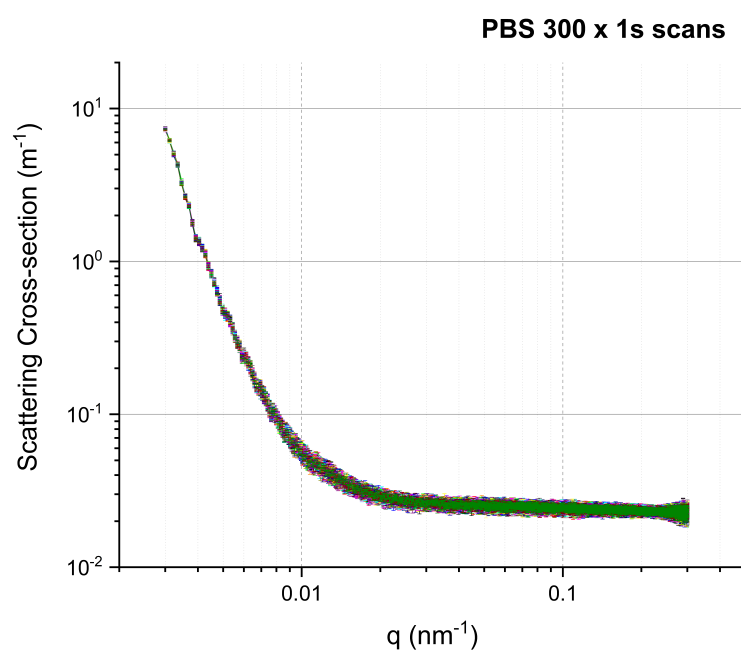

Figure 14: SAXS Scattering curves of the pure PBS buffer at different times. No change is observed for the overlay of 300 curves recorded for 1 s each.
